# Supplementary material for: U2-Net and ResNet50-Based Automatic Pipeline for Bacterial Colony Counting
Source: MDPI journal article supplement (doi:10.3390/microorganisms12010201), 2024-01-18
Supplement: s1 [file s1]

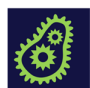

## Supplementary Materials

Table S1. CMOS parameters.

| Items                  | Parameters                                                                                                                 |
|------------------------|----------------------------------------------------------------------------------------------------------------------------|
| Brand and model        | SHL- U3CMOS05100KPA/TP105100A; <a href="https://shunhuali.com/product/229.html">https://shunhuali.com/product/229.html</a> |
| Image sensor circuit   | 1/2.5 inch; CMOS; Color                                                                                                    |
| Effective pixels       | 5.1 Mega pixels                                                                                                            |
| Pixel sizes            | 2.2 × 2.2 μm                                                                                                               |
| Frame-rates/Resolution | 14.2 fps/2560 × 1922 ppi                                                                                                   |
| Lens mount             | C-Mount                                                                                                                    |
| Signal-to-noise ratio  | 38.5 dB                                                                                                                    |
| Dynamic range          | 67.74 dB                                                                                                                   |
| Sensitivity            | 1.76 v/lux-sec                                                                                                             |
| Spectral range         | 380–650 nm (with an IR-cut filter)                                                                                         |
| Support systems        | Windows; Linux; macOS; or Android                                                                                          |
| Data interface         | USB                                                                                                                        |

Table S2. Len parameters.

| Items                   | Parameters                                                                                       |
|-------------------------|--------------------------------------------------------------------------------------------------|
| Brand and model         | SHL; <a href="https://shunhuali.com/product/188.html">https://shunhuali.com/product/188.html</a> |
| Focal length            | 2.8-12 mm                                                                                        |
| Chart size              | 1/2 inch                                                                                         |
| Pixel                   | 3 Mega pixels                                                                                    |
| Aperture value          | F1.6 (IR)                                                                                        |
| Mount                   | C-Mount                                                                                          |
| Back focal length       | 17.53 mm                                                                                         |
| Flange back length      | 9 mm                                                                                             |
| Minimum object distance | 0.3 m                                                                                            |

Table S3. Comparison of colony counting between ResNet50, Watershed, and a reference CNN algorithm [1].

| Class | A proposed CNN |        | Watershed |        | ResNet50  |        |
|-------|----------------|--------|-----------|--------|-----------|--------|
|       | Precision      | Recall | Precision | Recall | Precision | Recall |
| 2     | 0.93           | 0.92   | 0.67      | 0.57   | 0.90      | 0.97   |
| 3     | 0.83           | 0.88   | 0.51      | 0.48   | 0.95      | 0.84   |
| 4     | 0.77           | 0.70   | 0.37      | 0.37   | 0.91      | 0.89   |
| 5     | 0.59           | 0.44   | 0.24      | 0.26   | 0.86      | 0.90   |
| 6     | 0.71           | 0.73   | 0.21      | 0.45   | 0.96      | 0.88   |

Table S4. Recovery of our approach on the colony counting of eight different bacterial species.

| Colony type | <i>E. coli</i> | <i>L. ivanovii</i> | <i>L. monocytogenes</i> | <i>S. aureus</i> | <i>S. epidermidis</i> | <i>S. typhimurium</i> | <i>Shigella</i> | <i>V. parahaemolyticus</i> |
|-------------|----------------|--------------------|-------------------------|------------------|-----------------------|-----------------------|-----------------|----------------------------|
| Recovery    | 97.00%         | 99.77%             | 99.99%                  | 94.07%           | 98.39%                | 99.95%                | 99.30%          | 99.13%                     |

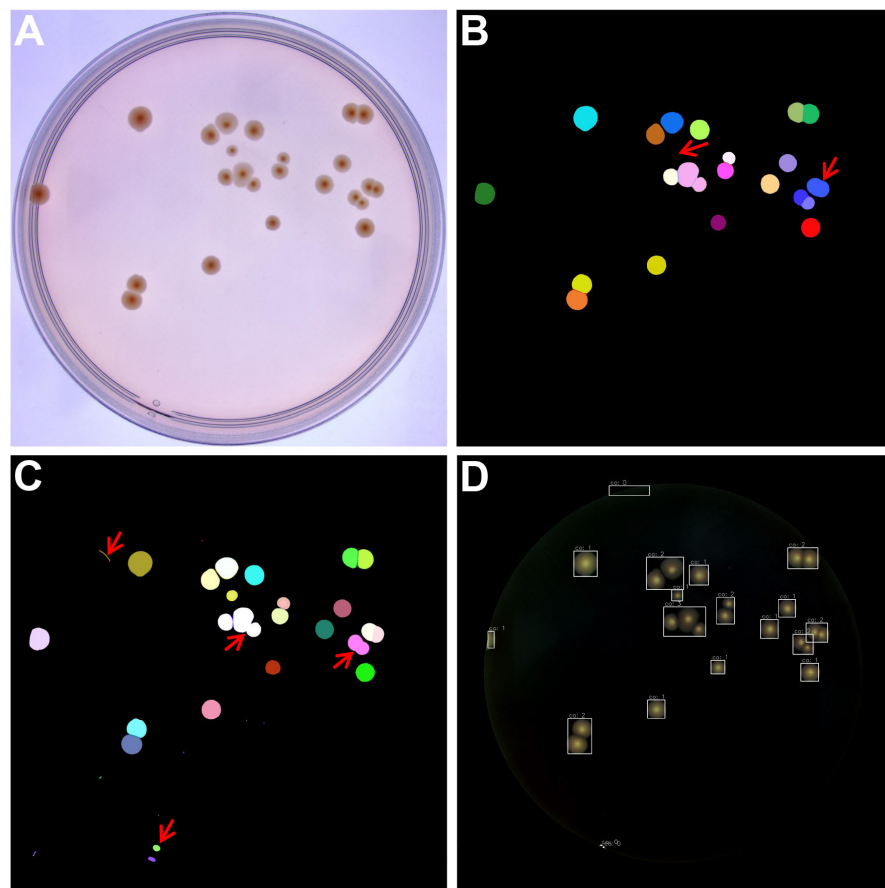

**Figure S1.** Comparison of the proposed method and SAM. (A) A raw colony image; (B) The result taking 31 seconds based on default parameters for SAM; (C) The result taking 411 seconds with carefully selected parameters for SAM; (D) The result taking 38 seconds based on default parameters for our approach. The red arrows represent identification of non-target objects, missed colony recognition, and inability to classify adhesive colonies. The default parameters for SAM are as follows: points\_per\_side: 32; points\_per\_batch: 64; pred\_iou\_thresh: 0.88; stability\_score\_thresh: 0.95; stability\_score\_offset: 1.0; box\_nms\_thresh: 0.7; crop\_n\_layers: 0; crop\_nms\_thresh: 0.7; crop\_overlap\_ratio: 0.3413; crop\_n\_points downscale\_factor: 1; point\_grids: None; min\_mask\_region\_area: 0; output\_mode: "binary\_mask". To enhance the accuracy of SAM in recognizing colonies, we modified the following parameters: points\_per\_side: 128; crop\_n\_layers: 3.

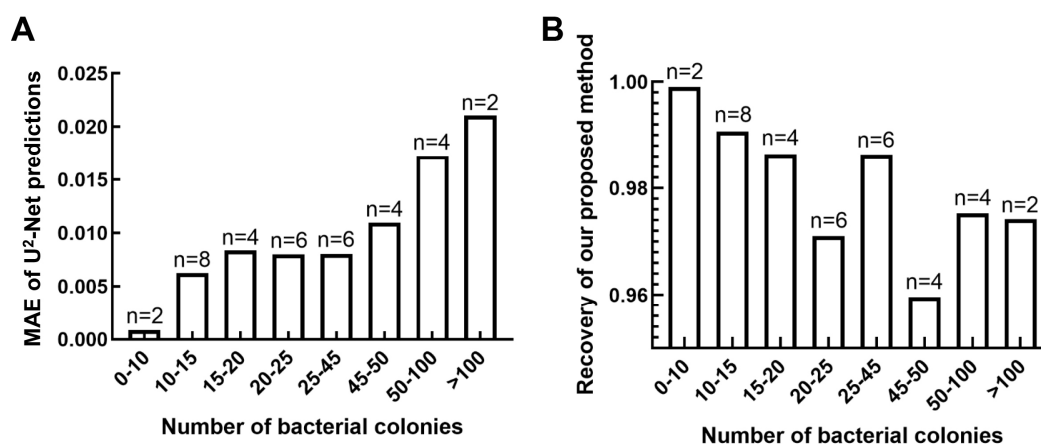

**Figure S2.** Increase in colony aggregation or the size of the colonies has a minor impact on colony counting. **(A)** Comparison of the MAE performance of U<sup>2</sup>-Net on images with different colony quantity ranges. **(B)** Comparison of the recovery performance of the entire counting process on images with different colony quantity ranges. The sample sizes for each colony quantity range are annotated on the bars in the histogram.

## References

1. Ferrari, A.; Lombardi, S.; Signoroni, A. Bacterial colony counting with Convolutional Neural Networks in Digital Microbiology Imaging. *Pattern Recognit* **2017**, *61*, 629–640. <https://doi.org/10.1016/j.patcog.2016.07.016>.
